# Supplementary material
Source: MDPI journal article supplement (https://www.mdpi.com/2218-0532/92/1/14)
Supplement: s1 [file s1]

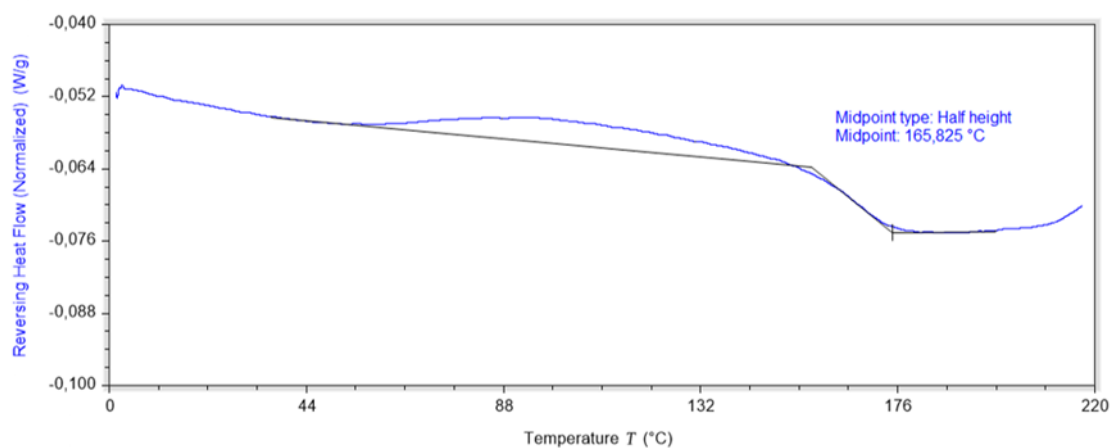

**Figure S 1. Results of DSC analysis of the IPEC 1 after 2 h in 0.1 M HCl**

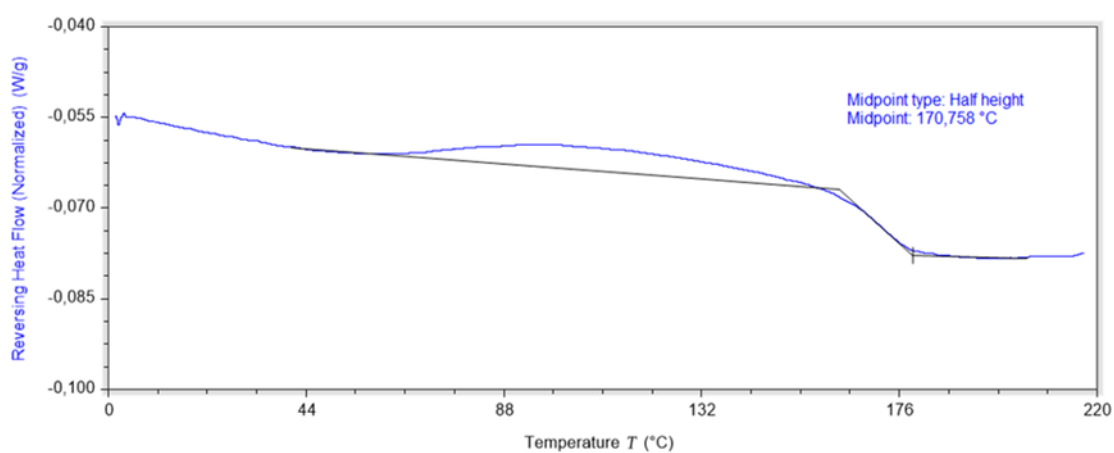

**Figure S 2. Results of DSC analysis of the IPEC 1 after 4 h in 0.1 M HCl**

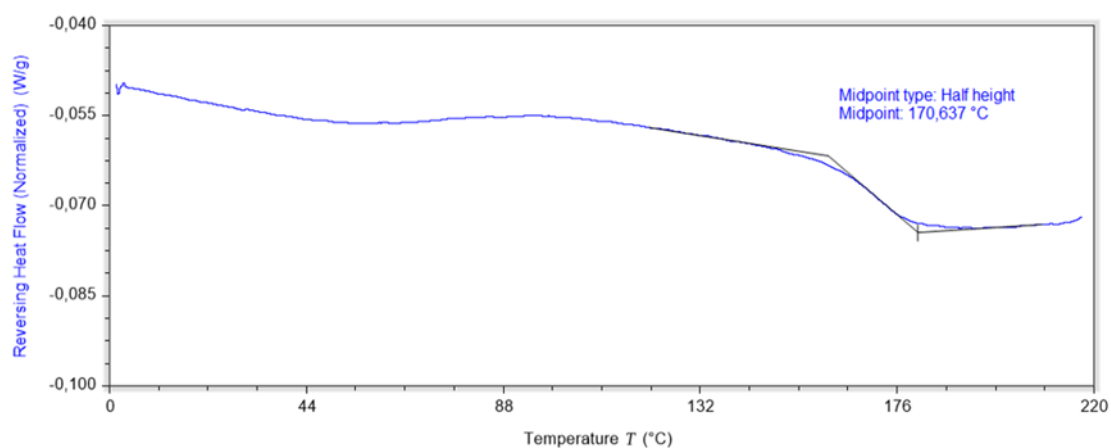

**Figure S 3. Results of DSC analysis of the IPEC 1 after 6 h in 0.1 M HCl**

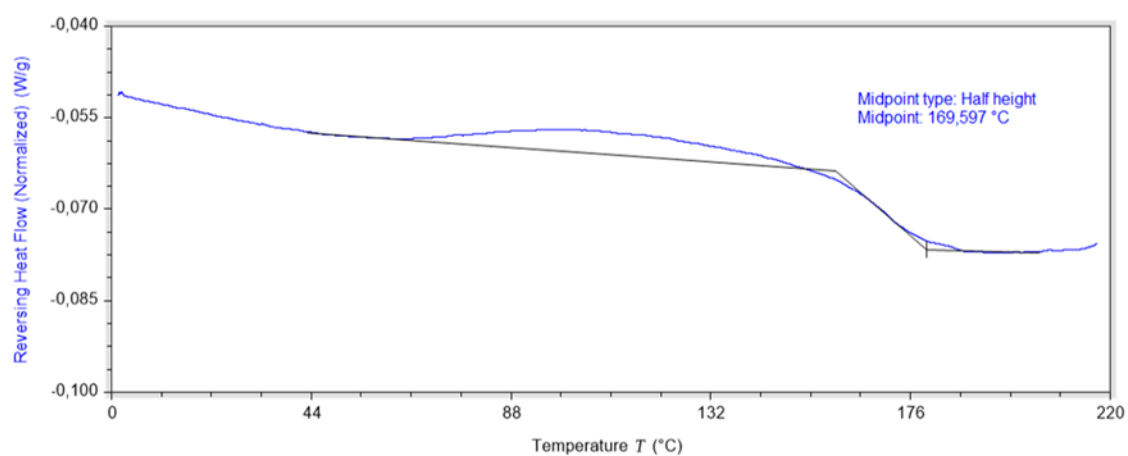

**Figure S 4. Results of DSC analysis of the IPEC 2 after 2 h in 0.1 M HCl**

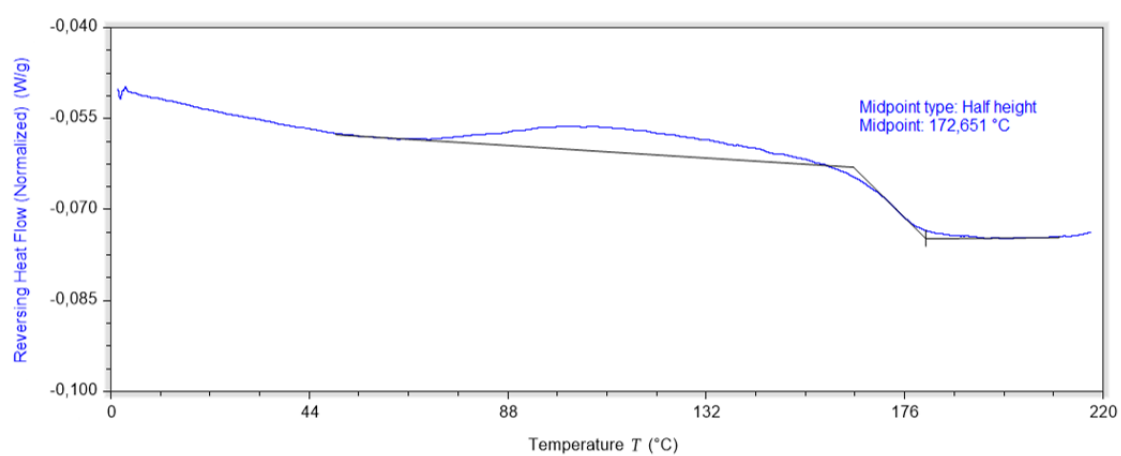

**Figure S 5. Results of DSC analysis of the IPEC 2 after 4 h in 0.1 M HCl**

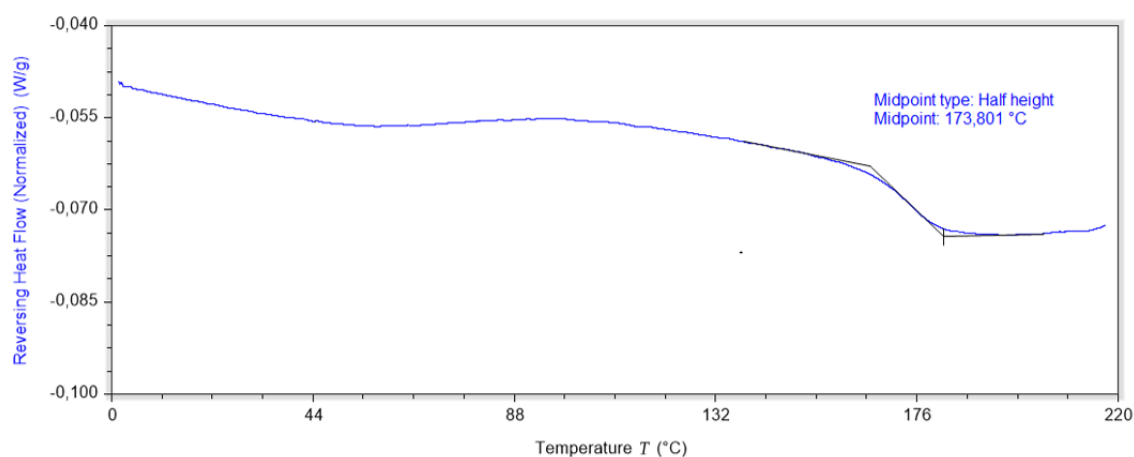

**Figure S 6. Results of DSC analysis of the IPEC 2 after 6 h in 0.1 M HCl**
